# Supplementary material for: Cardiovascular Risk Estimation Is Suboptimal in People With HIV
Source: PubMed Central journal article supplement — J Am Heart Assoc. 2024 May 18;13(10):e029228. doi: 10.1161/JAHA.123.029228 (PMC11179796; doi:10.1161/jaha.123.029228), 2024-05-18
Supplement: JAH3-13-e029228-s001.pdf [file JAH3-13-e029228-s001.pdf]

# **Supplemental Material**

**Table S1. Baseline Characteristics by Cohort.**

|                                     | Overall           |                   |                                   | KPNC              |                   |                                   | MGB               |                   |                                   |
|-------------------------------------|-------------------|-------------------|-----------------------------------|-------------------|-------------------|-----------------------------------|-------------------|-------------------|-----------------------------------|
|                                     | PWH               | Control           | Std. mean difference <sup>1</sup> | PWH               | Control           | Std. mean difference <sup>1</sup> | PWH               | Control           | Std. mean difference <sup>1</sup> |
|                                     | N=9412            | N= 32322          |                                   | N=7260            | N=24597           |                                   | N=2152            | N=7725            |                                   |
| <b>Demographics</b>                 |                   |                   |                                   |                   |                   |                                   |                   |                   |                                   |
| Age, median (Q1, Q3)                | 45.1 (39.1, 51.4) | 43.6 (34.5, 52.4) | 0.16                              | 45.7 (39.5, 52.0) | 44.4 (35.4, 52.6) | 0.18                              | 43.3 (38.0, 49.3) | 40.9 (31.8, 51.7) | 0.10                              |
| Male sex, N (%)                     | 8148 (86.6%)      | 27719 (85.8%)     |                                   | 6519 (89.8%)      | 22050 (89.6%)     |                                   | 1629 (75.7%)      | 5669 (73.4%)      |                                   |
| Race/ethnicity                      |                   |                   |                                   |                   |                   |                                   |                   |                   |                                   |
| Black, N (%)                        | 1649 (17.5%)      | 5895 (18.2%)      |                                   | 1079 (14.9%)      | 3949 (16.1%)      |                                   | 570 (26.5%)       | 1946 (25.2%)      |                                   |
| Hispanic, N (%)                     | 1586 (16.9%)      | 5737 (17.7%)      |                                   | 1315 (18.1%)      | 4705 (19.1%)      |                                   | 271 (12.6%)       | 1032 (13.4%)      |                                   |
| White, N (%)                        | 4933 (52.4%)      | 16313 (50.5%)     |                                   | 3838 (52.9%)      | 12348 (50.2%)     |                                   | 1095 (50.9%)      | 3965 (51.3%)      |                                   |
| Other, N (%)                        | 857 (9.1%)        | 2982 (9.2%)       |                                   | 722 (9.9%)        | 2463 (10.0%)      |                                   | 135 (6.3%)        | 519 (6.7%)        |                                   |
| Unknown/missing, N (%)              | 387 (4.1%)        | 1395 (4.3%)       |                                   | 306 (4.2%)        | 1132 (4.6%)       |                                   | 81 (3.8%)         | 263 (3.4%)        |                                   |
| <b>Traditional CVD risk factors</b> |                   |                   |                                   |                   |                   |                                   |                   |                   |                                   |
| Hypertension, N (%)                 | 2219 (23.6%)      | 8185 (25.3%)      |                                   | 1687 (23.2%)      | 5566 (22.6%)      |                                   | 532 (24.7%)       | 2619 (33.9%)      |                                   |

|                                           | Overall           |                  |                                   | KPNC              |                   |                                   | MGB               |                    |                                   |
|-------------------------------------------|-------------------|------------------|-----------------------------------|-------------------|-------------------|-----------------------------------|-------------------|--------------------|-----------------------------------|
|                                           | PWH               | Control          | Std. mean difference <sup>1</sup> | PWH               | Control           | Std. mean difference <sup>1</sup> | PWH               | Control            | Std. mean difference <sup>1</sup> |
|                                           | N=9412            | N= 32322         |                                   | N=7260            | N=24597           |                                   | N=2152            | N=7725             |                                   |
| Systolic blood pressure, median (Q1, Q3)  | 122<br>(112,132)  | 123.4<br>(15.11) | -0.01                             | 122<br>(113, 132) | 123<br>(114, 132) | -0.01                             | 121<br>(111, 132) | 120<br>(110, 130)  | 0.01                              |
| Diastolic blood pressure, median (Q1, Q3) | 76<br>(69, 83)    | 76<br>(69, 82)   | 0.02                              | 75<br>(68, 82)    | 75<br>(68, 82)    | 0.02                              | 79<br>(70, 85)    | 78<br>(70.0, 84.0) | 0.03                              |
| Hypertension treatment, N (%)             | 2547<br>(27.1%)   | 8441<br>(26.1%)  |                                   | 1950<br>(26.9%)   | 6075<br>(24.7%)   |                                   | 597<br>(27.7%)    | 2366<br>(30.6%)    |                                   |
| Hyperlipidemia, N (%)                     | 2984<br>(31.7%)   | 8352<br>(25.8%)  |                                   | 2424<br>(33.4%)   | 5361<br>(21.8%)   |                                   | 560<br>(26.0%)    | 2991<br>(38.7%)    |                                   |
| Total cholesterol, median (Q1, Q3)        | 179<br>(152, 207) | 180.6<br>(40.10) | 0.02                              | 181<br>(154, 209) | 179<br>(155, 207) | 0.04                              | 172<br>(144, 202) | 174<br>(149, 202)  | -0.03                             |
| HDL cholesterol, median (Q1, Q3)          | 42<br>(35, 51)    | 44.5<br>(12.09)  | -0.04                             | 43<br>(35, 52)    | 43<br>(37, 51)    | -0.04                             | 40<br>(32, 51)    | 42<br>(35, 50)     | -0.05                             |
| Statin treatment, N (%)                   | 1441<br>(15.3%)   | 4226<br>(13.1%)  |                                   | 1220<br>(16.8%)   | 3069<br>(12.5%)   |                                   | 221<br>(10.3%)    | 1157<br>(15.0%)    |                                   |
| Diabetes mellitus, N (%)                  | 573<br>(6.1%)     | 2059<br>(6.4%)   |                                   | 399<br>(5.5%)     | 1409<br>(5.7%)    |                                   | 174<br>(8.1%)     | 650<br>(8.4%)      |                                   |
| Smoking, N (%)                            | 2461<br>(26.1%)   | 8835<br>(27.3%)  |                                   | 1523<br>(21.0%)   | 5539<br>(22.5%)   |                                   | 938<br>(43.6%)    | 3296<br>(42.7%)    |                                   |
| CHD event, N (%)                          | 158               | 402<br>(1.2%)    |                                   | 121<br>(1.7%)     | 306               |                                   | 37                | 96                 |                                   |

|                                  | Overall           |               |                                   | KPNC              |               |                                   | MGB               |               |                                   |
|----------------------------------|-------------------|---------------|-----------------------------------|-------------------|---------------|-----------------------------------|-------------------|---------------|-----------------------------------|
|                                  | PWH               | Control       | Std. mean difference <sup>1</sup> | PWH               | Control       | Std. mean difference <sup>1</sup> | PWH               | Control       | Std. mean difference <sup>1</sup> |
|                                  | N=9412            | N= 32322      |                                   | N=7260            | N=24597       |                                   | N=2152            | N=7725        |                                   |
|                                  | (1.7%)            |               |                                   |                   | (1.2%)        |                                   | (1.7%)            | (1.2%)        |                                   |
| CVD event, N (%)                 | 309<br>(3.3%)     | 803<br>(2.5%) |                                   | 252<br>(3.5%)     | 634<br>(2.6%) |                                   | 57<br>(2.6%)      | 169<br>(2.2%) |                                   |
| <b>HIV-related factors</b>       |                   |               |                                   |                   |               |                                   |                   |               |                                   |
| CD4 count, median (Q1, Q3)       | 492<br>(316, 690) |               |                                   | 509<br>(334, 703) |               |                                   | 438<br>(263, 657) |               |                                   |
| CD4 count nadir, median (Q1, Q3) | 283<br>(132, 468) |               |                                   | 310<br>(166, 498) |               |                                   | 181<br>(54, 346)  |               |                                   |
| HIV RNA <400 (copies/ml), N (%)  | 6356<br>(68.0%)   |               |                                   | 5317<br>(73.9%)   |               |                                   | 1039<br>(48.3%)   |               |                                   |
| Antiretroviral therapy, N (%)    | 7833<br>(83.2%)   |               |                                   | 6065<br>(83.5%)   |               |                                   | 1768<br>(82.2%)   |               |                                   |
| NRTI, N (%) <sup>2</sup>         | 7618<br>(97.3%)   |               |                                   | 5947<br>(98.1%)   |               |                                   | 1671<br>(94.5%)   |               |                                   |
| NNRTI, N (%) <sup>2</sup>        | 3871<br>(49.4%)   |               |                                   | 3001<br>(49.5%)   |               |                                   | 870<br>(49.2%)    |               |                                   |
| PI, N (%) <sup>2</sup>           | 3281<br>(41.9%)   |               |                                   | 2449<br>(40.4%)   |               |                                   | 832<br>(47.1%)    |               |                                   |
| INSTI, N (%) <sup>2</sup>        | 1609<br>(20.5%)   |               |                                   | 1377<br>(22.7%)   |               |                                   | 232<br>(13.1%)    |               |                                   |

|                                   | Overall              |                      |                                   | KPNC                 |                      |                                   | MGB                  |                      |                                   |
|-----------------------------------|----------------------|----------------------|-----------------------------------|----------------------|----------------------|-----------------------------------|----------------------|----------------------|-----------------------------------|
|                                   | PWH                  | Control              | Std. mean difference <sup>1</sup> | PWH                  | Control              | Std. mean difference <sup>1</sup> | PWH                  | Control              | Std. mean difference <sup>1</sup> |
|                                   | N=9412               | N= 32322             |                                   | N=7260               | N=24597              |                                   | N=2152               | N=7725               |                                   |
| Other, N (%) <sup>2</sup>         | 1450<br>(18.5%)      |                      |                                   | 714<br>(11.8%)       |                      |                                   | 736<br>(41.6%)       |                      |                                   |
| Duration HIV, median (Q1, Q3)     | 6.5<br>(1.3, 14.1)   |                      |                                   | 9.4<br>(3.5, 16.1)   |                      |                                   | 0.8<br>(0.0, 3.8)    |                      |                                   |
| <b>Cohort characteristics</b>     |                      |                      |                                   |                      |                      |                                   |                      |                      |                                   |
| Year of baseline, median (Q1, Q3) | 2009<br>(2006, 2013) | 2009<br>(2006, 2013) | -0.05                             | 2010<br>(2007, 2014) | 2010<br>(2007, 2014) | -0.06                             | 2005<br>(2002, 2009) | 2005<br>(2003, 2008) | -0.08                             |

<sup>1</sup> Standardized mean difference is calculated as a difference between PWH mean vs. control mean divided by a pooled standard deviation

<sup>2</sup> Percent of those on ART

KPNC, Kaiser Permanente Northern California; MGB, Mass General Brigham; CVD, cardiovascular disease; HDL, high-density lipoprotein; CHD, coronary heart disease; NRTI, nucleoside reverse transcriptase inhibitor; NNRTI, non-nucleoside reverse transcriptase inhibitor; PI, protease inhibitor; INSTI, Integrase strand transfer inhibitor.



|                | N    | Median Years of Follow-up (Q1,Q3) | Events | Median Risk Score (Q1,Q3) | Discrimination c statistic (95% CI) | Calibration $\chi^2$ | Calibration p-value |
|----------------|------|-----------------------------------|--------|---------------------------|-------------------------------------|----------------------|---------------------|
| <b>FHS CHD</b> |      |                                   |        |                           |                                     |                      |                     |
| Women          | 739  | 5.45 (2.65, 10.00)                | 8      | 0.007 (0.003, 0.014)      | 0.869 (0.785, 0.953)                | N/A <sup>1</sup>     | N/A <sup>1</sup>    |
| Men            | 6505 | 4.92 (2.34, 9.65)                 | 113    | 0.030 (0.012, 0.053)      | 0.711 (0.658, 0.763)                | 24.0513              | 0.0011              |
|                |      |                                   |        |                           |                                     |                      |                     |
| <b>FHS CVD</b> |      |                                   |        |                           |                                     |                      |                     |
| Women          | 739  | 5.40 (2.61, 10.00)                | 22     | 0.013 (0.008, 0.026)      | 0.811 (0.732,0.890)                 | 8.75821              | 0.0125              |
| Men            | 6505 | 4.83 (2.28, 9.47)                 | 224    | 0.037 (0.021, 0.064)      | 0.722 (0.686, 0.758)                | 16.6573              | 0.0544              |

<sup>1</sup>N/A indicates that there were not enough events to obtain the calibration results.

CVD, cardiovascular disease; MGB, Mass General Brigham; ACC/AHA, American College of Cardiology/American Heart Association; FHS, Framingham Heart Study; CHD, coronary heart disease; KPNC, Kaiser Permanente Northern California.

**Table S3. Coefficients for CHD and CVD risk functions.**

| Risk Factor                          | Men                    |                              | Women                  |                              |
|--------------------------------------|------------------------|------------------------------|------------------------|------------------------------|
|                                      | Original Function Beta | HIV Dataset Beta (Std. Err.) | Original Function Beta | HIV Dataset Beta (Std. Err.) |
| <b>ACC/AHA</b>                       |                        |                              |                        |                              |
| <b>White Coefficients</b>            |                        |                              |                        |                              |
| Ln Age                               | 12.344                 | -8.607 (10.43)               | -29.799                | -59.83 (92.84)               |
| Ln Total Cholesterol                 | 11.853                 | -7.889 (8.34)                | 13.540                 | 43.58 (28.32)                |
| Ln HDL Cholesterol                   | -7.990                 | -2.439 (6.27)                | -13.578                | -38.23 (18.71)               |
| Ln Treated SBP                       | 1.797                  | 1.068 (0.57)                 | 2.019                  | 1.405 (1.85)                 |
| Ln Untreated SBP                     | 1.764                  | 0.998 (0.57)                 | 1.957                  | 1.273 (1.88)                 |
| Smoking                              | 7.837                  | 4.369 (4.50)                 | 7.574                  | -21.86 (15.93)               |
| Diabetes                             | 0.658                  | 0.221 (0.224)                | 0.661                  | 0.792 (0.68)                 |
| Ln Age x Ln Total Cholesterol        | -2.664                 | 2.251 (2.11)                 | -3.114                 | -11.42 (7.22)                |
| Ln Age x Ln HDL Cholesterol          | 1.769                  | 0.312 (1.58)                 | 3.149                  | 9.64 (4.75)                  |
| Ln Age x Smoking                     | -1.795                 | -0.931 (1.14)                | -1.665                 | 5.86 (4.08)                  |
| Ln Age x Ln Age                      | NA                     | NA                           | 4.884                  | 10.53 (10.35)                |
| <b>African-American Coefficients</b> |                        |                              |                        |                              |
| Ln Age                               | 2.469                  | 1.977 (1.18)                 | 17.114                 | 38.75 (57.03)                |
| Ln Total Cholesterol                 | 0.302                  | 0.171 (0.71)                 | 0.940                  | 0.651 (1.01)                 |
| Ln HDL Cholesterol                   | -0.307                 | -0.079 (0.52)                | -18.920                | -21.63 (24.78)               |
| Ln Treated SBP                       | 1.916                  | 3.495 (1.36)                 | 29.291                 | 45.12 (44.26)                |
| Ln Untreated SBP                     | 1.809                  | 3.543 (1.38)                 | 27.820                 | 43.73 (45.06)                |
| Smoking                              | 0.549                  | 0.798 (0.33)                 | 0.691                  | 1.220 (0.55)                 |
| Diabetes                             | 0.645                  | 0.868 (0.38)                 | 0.874                  | -0.522 (0.82)                |
| Ln Age x Ln HDL Cholesterol          | NA                     | NA                           | 4.475                  | 5.108 (6.30)                 |
| Ln Age x Ln Treated SBP              | NA                     | NA                           | -6.432                 | -11.00 (11.13)               |
| Ln Age x Ln Untreated SBP            | NA                     | NA                           | -6.087                 | -10.71 (11.33)               |
| <b>FHS CHD</b>                       |                        |                              |                        |                              |
| Age                                  | 0.05                   | 0.067 (0.010)                | 0.17                   | 0.380 (0.335)                |



| Risk Factor                        | Men                    |                              | Women                  |                              |
|------------------------------------|------------------------|------------------------------|------------------------|------------------------------|
|                                    | Original Function Beta | HIV Dataset Beta (Std. Err.) | Original Function Beta | HIV Dataset Beta (Std. Err.) |
| Age Squared                        | -                      | -                            | 0.001                  | -0.003 (0.003)               |
| Blood Pressure                     |                        |                              |                        |                              |
| Optimal (SBP<120, DBP<80)          | 0.09                   | -0.089 (0.247)               | -0.74                  | -1.188 (0.810)               |
| Normal (SBP<130, DBP<85)           | Reference              |                              | Reference              |                              |
| High Normal (SBP<140, DBP<90)      | 0.42                   | 0.280 (0.248)                | -0.37                  | -1.739 (1.226)               |
| Stage I HTN (SBP<160, DBP<100)     | 0.66                   | 0.602 (0.243)                | 0.22                   | 0.433 (0.747)                |
| Stage II-IV HTN (SBP≥160, DBP≥100) | 0.9                    | 0.191 (0.421)                | 0.61                   | 0.458 (0.944)                |
| Total Cholesterol                  |                        |                              |                        |                              |
| < 160                              | -0.38                  | -0.073 (0.219)               | 0.21                   | 21 (12185)                   |
| 160-199                            | Reference              |                              | Reference              |                              |
| 200-239                            | 0.57                   | 0.033 (0.225)                | 0.44                   | 20 (12185)                   |
| 240-279                            | 0.74                   | 0.219 (0.314)                | 0.56                   | 22 (12185)                   |
| >= 280                             | 0.83                   | 1.027 (0.364)                | 0.89                   | 23 (12185)                   |
| HDL                                |                        |                              |                        |                              |
| <35                                | 0.61                   | 0.156 (0.293)                | 0.73                   | 19 (3053)                    |
| 35-44                              | 0.37                   | 0.300 (0.275)                | 0.60                   | 18 (3053)                    |
| 45-49                              | Reference              |                              | 0.60                   | 2.04 (3769)                  |
| 50-59                              | 0                      | -0.430 (0.361)               | Reference              |                              |
| >= 60                              | -0.46                  | -0.485 (0.413)               | 0.54                   | 17 (3053)                    |
| Diabetes                           | 0.53                   | 0.677 (0.239)                | 0.87                   | 0.309 (0.729)                |
| Smoking                            | 0.73                   | 0.843 (0.175)                | 0.98                   | 2.484 (0.682)                |
|                                    |                        |                              |                        |                              |
| <b>FHS CVD</b>                     |                        |                              |                        |                              |
| Ln Age                             | 3.061                  | 3.351 (0.38)                 | 2.329                  | 2.838 (1.00)                 |
| Ln Total Cholesterol               | 1.124                  | 0.781 (0.26)                 | 1.209                  | -0.479 (0.65)                |
| Ln HDL Cholesterol                 | -0.933                 | -1.028 (0.19)                | -0.708                 | -0.807 (0.50)                |

| Risk Factor      | Men                    |                              | Women                  |                              |
|------------------|------------------------|------------------------------|------------------------|------------------------------|
|                  | Original Function Beta | HIV Dataset Beta (Std. Err.) | Original Function Beta | HIV Dataset Beta (Std. Err.) |
| Ln Treated SBP   | 1.999                  | 1.371 (0.50)                 | 2.822                  | 2.319 (1.08)                 |
| Ln Untreated SBP | 1.933                  | 1.313 (0.50)                 | 2.762                  | 2.122 (1.10)                 |
| Smoking          | 0.655                  | 0.684 (0.13)                 | 0.529                  | 1.060 (0.34)                 |
| Diabetes         | 0.574                  | 0.338 (0.19)                 | 0.692                  | 0.245 (0.47)                 |

CHD, coronary heart disease; CVD, cardiovascular disease; ACC/AHA, American College of Cardiology/American Heart Association; HDL, high-density lipoprotein; SBP, systolic blood pressure; FHS, Framingham Heart Study; DBP, diastolic blood pressure.

**Table S4. Observed and Predicted Risk by Tertile among Individuals without HIV.**

|                                  | ACC/AHA   |           |           | FHS CHD   |           |           | FHS CVD   |           |           |
|----------------------------------|-----------|-----------|-----------|-----------|-----------|-----------|-----------|-----------|-----------|
|                                  | Tertile 1 | Tertile 2 | Tertile 3 | Tertile 1 | Tertile 2 | Tertile 3 | Tertile 1 | Tertile 2 | Tertile 3 |
| <b>Men</b>                       |           |           |           |           |           |           |           |           |           |
| Predicted Risk                   | 0.022     | 0.060     | 0.166     | 0.014     | 0.035     | 0.099     | 0.016     | 0.041     | 0.116     |
| Observed Risk                    | 0.028     | 0.059     | 0.114     | 0.006     | 0.022     | 0.052     | 0.015     | 0.039     | 0.099     |
| Predicted-to-Observed Risk Ratio | 0.79      | 1.02      | 1.46      | 2.33      | 1.59      | 1.90      | 1.07      | 1.05      | 1.17      |
|                                  |           |           |           |           |           |           |           |           |           |
| <b>Women</b>                     |           |           |           |           |           |           |           |           |           |
| Predicted Risk                   | 0.006     | 0.022     | 0.108     | 0.002     | 0.007     | 0.038     | 0.005     | 0.013     | 0.046     |
| Observed Risk                    | 0.010     | 0.028     | 0.059     | 0.003     | 0.005     | 0.022     | 0.005     | 0.017     | 0.046     |
| Predicted-to-Observed Risk Ratio | 0.60      | 0.79      | 1.83      | 0.67      | 1.40      | 1.72      | 1.00      | 0.76      | 1.00      |

Demler/D'Agostino-Nam  $\chi^2$  (p-value) for men:  $\chi^2=83.44$  ( $p<0.0001$ ) for ACC/AHA;  $\chi^2=248$  ( $p<0.0001$ ) for FHS CHD;  $\chi^2=13.86$  ( $p=0.001$ ) for FHS CVD.

Demler/D'Agostino-Nam  $\chi^2$  (p-value) for women:  $\chi^2=21.93$  ( $p<0.0001$ ) for ACC/AHA;  $\chi^2=9.33$  ( $p=0.009$ ) for FHS CHD;  $\chi^2=0.58$  ( $p=0.747$ ) for FHS CVD.

ACC/AHA, American College of Cardiology/American Heart Association; FHS, Framingham Heart Study; CHD, coronary heart disease; CVD, cardiovascular disease.
